# Supplementary material
Source: Springer Nature journal article supplement (https://www.springermedizin.de/resource/supplementary/12887_2004_80_MOESM2_ESM.pdf/9477216)

% Perforation

Any perforation

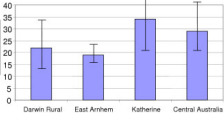

Supplement: MOESM2 [file 9477216]
